# Supplementary material for: Localized photothermal effect of Co3O4 nanowires boosts catalytic performance in glucose electrochemical detection
Source: Royal Society of Chemistry journal article supplement (doi:10.1039/d4qi01554a), 2024-01-01
Supplement: d4qi01554a1.pdf [file d4qi01554a1.pdf]

## **Electronic Supplementary Information**

### **Localized photothermal effect of $\text{Co}_3\text{O}_4$ nanowires boosts its catalytic performance in glucose electrochemical detection**

Teng You, Shuang Xiao, Ping Huang, Chunyan Wang, Ping Jiang\*, Daiping He\*

Chongqing Key Laboratory of Inorganic Functional Materials, College of Chemistry,

Chongqing Normal University, Chongqing 401331, China

E-mail: [jphdp868@126.com](mailto:jphdp868@126.com); [hedaiping@126.com](mailto:hedaiping@126.com).

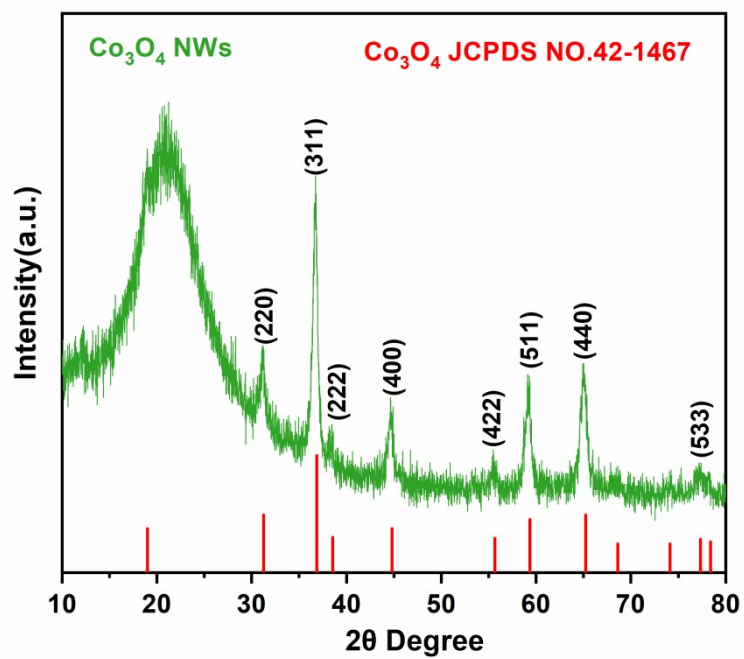

Fig. S1. XRD pattern of calcinated product scratched from NF.

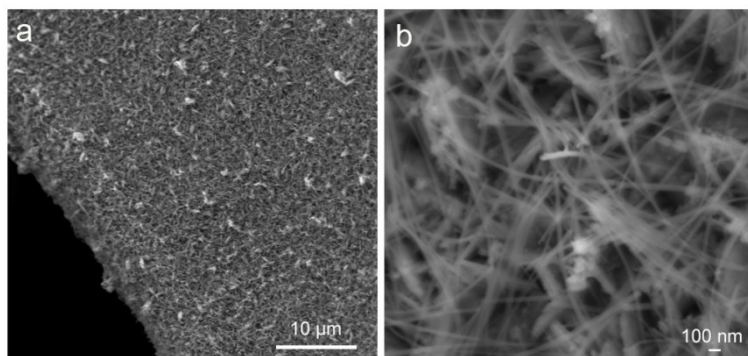

**Fig. S2.** (a) Low- and (b) high- magnification SEM images of Co precursor.

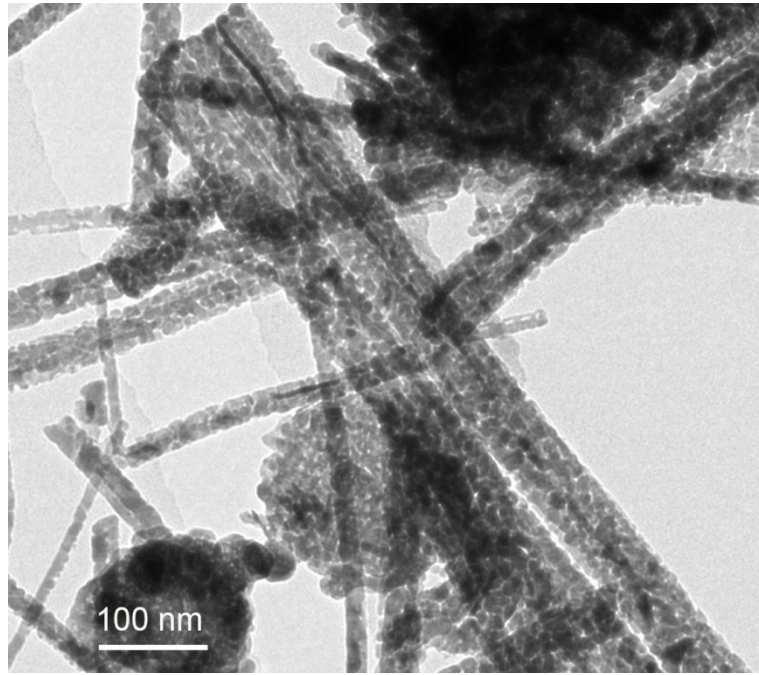

**Fig. S3.** TEM images of Co<sub>3</sub>O<sub>4</sub> NWs scratched from NF.

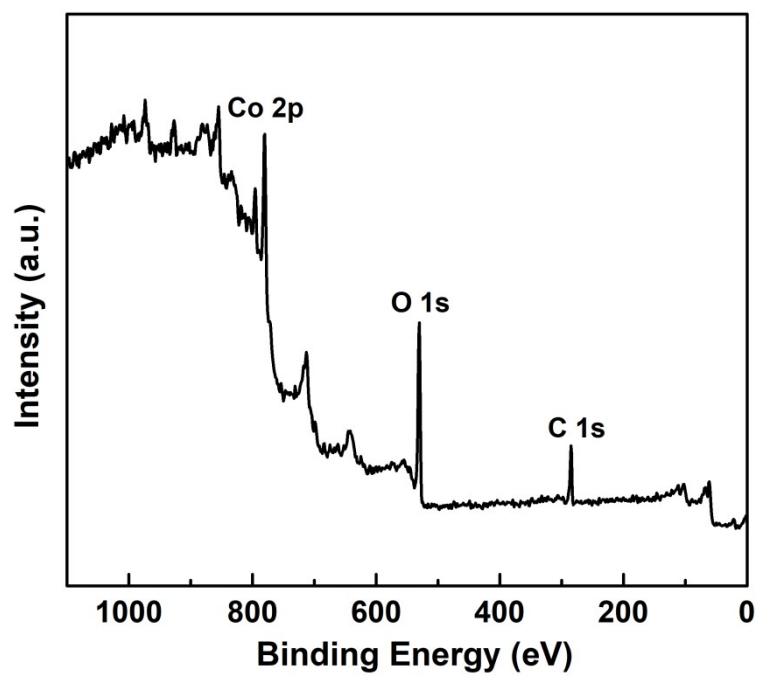

**Fig. S4.** XPS survey spectrum of  $\text{Co}_3\text{O}_4$  NWs/NF.

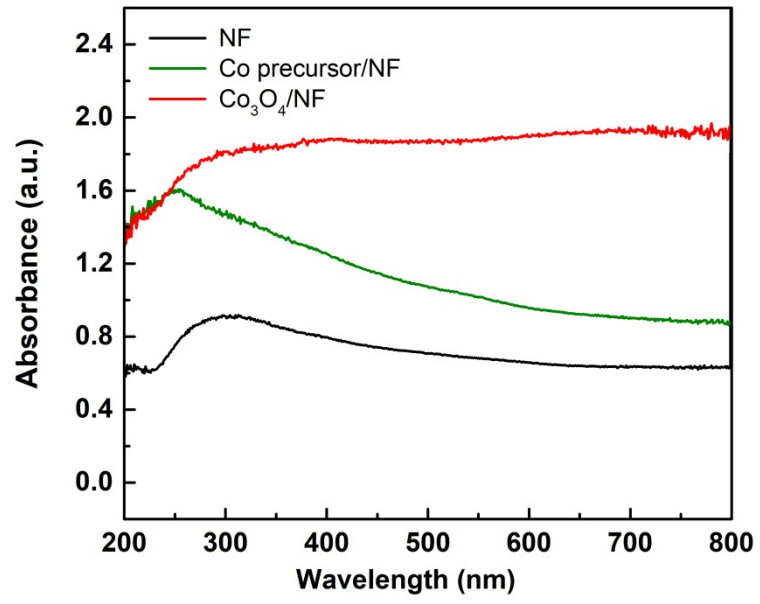

**Fig. S5.** UV-vis absorption spectrum of NF, Co precursor/NF and Co<sub>3</sub>O<sub>4</sub> NWs/NF.

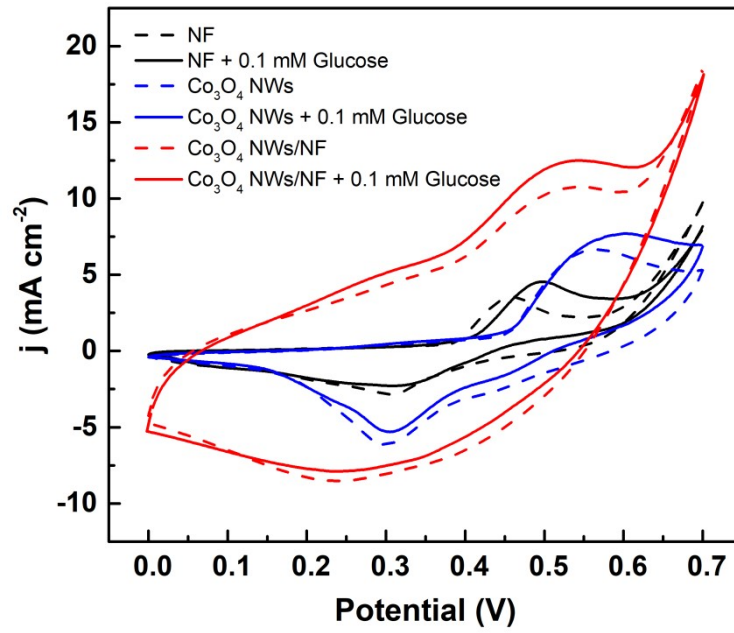

**Fig. S6.** CV curves of NF, Co<sub>3</sub>O<sub>4</sub> NWs, and Co<sub>3</sub>O<sub>4</sub> NWs/NF before (dash line) and after (solid line) addition of 0.1 mM glucose.

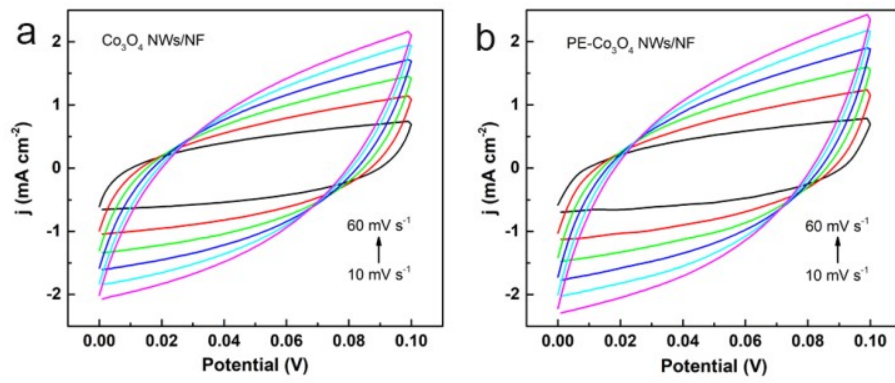

**Fig. S7.** CV curves of  $\text{Co}_3\text{O}_4$  NWs/NF (a) and PE- $\text{Co}_3\text{O}_4$  NWs/NF.



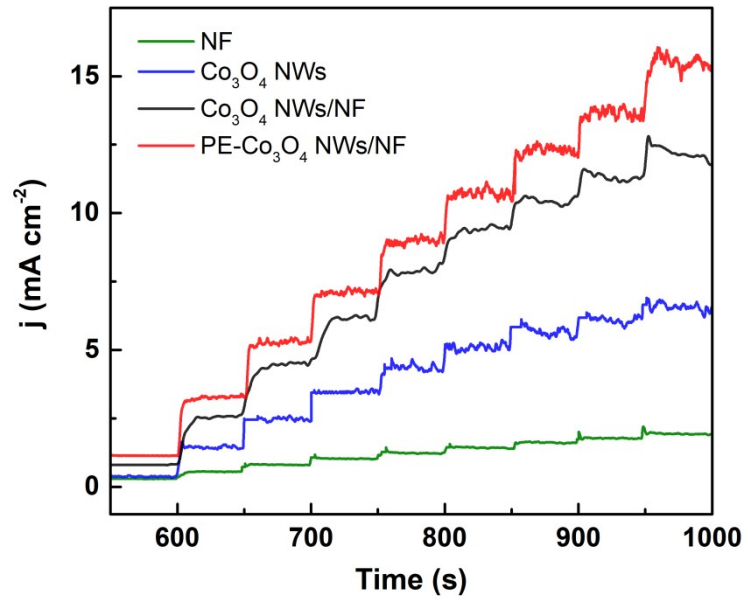

**Fig. S8.** Current responses of NF, Co<sub>3</sub>O<sub>4</sub> NWs, Co<sub>3</sub>O<sub>4</sub> NWs/NF, and PE-Co<sub>3</sub>O<sub>4</sub> NWs/NF at 0.55 V for continuous addition of 0.1 mM glucose.

**Table S1.** Comparison of the performances for various  $\text{Co}_3\text{O}_4$  based enzyme-free glucose electrochemical sensors.

| Sensors                                                          | Sensitivity<br>( $\text{mA mM}^{-1}$<br>$\text{cm}^{-2}$ ) | Linear<br>range<br>( $\text{mM}$ ) | LOD<br>( $\mu\text{M}$ ) | Potential<br>(V) | Refs         |
|------------------------------------------------------------------|------------------------------------------------------------|------------------------------------|--------------------------|------------------|--------------|
| $\text{MnO}_2/\text{Co}_3\text{O}_4$                             | 0.13                                                       | 0 - 7                              | 0.03                     | 0.55             | 43           |
| SS- $\text{Co}_3\text{O}_4$                                      | 0.67                                                       | 0.04 - 4.8                         | 3                        | 0.48             | 14           |
| $\text{Co}_3\text{O}_4/\text{rGO}$                               | 0.082                                                      | 0 - 2.0                            | 50                       | 0.35             | 38           |
| $\text{Co}_3\text{O}_4\text{-MCNT}$                              | 2.55                                                       | 0.001-0.122                        | 0.2                      | 0.50             | 44           |
| NF/ $\text{NiCo}_2\text{O}_4\text{NWs@Co}_3\text{O}_4\text{NPs}$ | 3.80                                                       | 0.02 - 0.1                         | 10                       | 0.60             | 45           |
| $\text{Co}_3\text{O}_4\text{NPs@HCC-MWCNTs/GCE}$                 | 1.26                                                       | 0.0005 - 0.1                       | 0.043                    | 0.65             | 46           |
| $\text{CuO-Co}_3\text{O}_4$                                      | 1.50                                                       | 0 - 2.0                            | 1.50                     | 0.55             | 47           |
| Porous $\text{Co}_3\text{O}_4$                                   | 1.06                                                       | 0 - 0.60                           | 0.32                     | 0.55             | 48           |
| $\text{rGO@Co}_3\text{O}_4\text{-NC/ITO}$                        | 2.56                                                       | 0.0005-0.02                        | 0.050                    | 0.65             | 49           |
| $\text{Co}_3\text{O}_4\text{ NWs/NF}$                            | 14.35                                                      | 0.001 - 0.73                       | 0.97                     | 0.55             | This<br>work |
| PE- $\text{Co}_3\text{O}_4\text{ NWs/NF}$                        | 26.14                                                      | 0.001 - 0.73                       | 0.56                     | 0.55             | This<br>work |

**Table S2.** Determination of glucose in spiked human serum sample 1 using the present PE-Co<sub>3</sub>O<sub>4</sub> NWs/NF.

| Sample   | Found ( $\mu\text{M}$ ) | Add ( $\mu\text{M}$ ) | Detected ( $\mu\text{M}$ ) | Recover (%) | RSD (% , n=3) |
|----------|-------------------------|-----------------------|----------------------------|-------------|---------------|
| Sample 1 | 6.11                    | 10.0                  | $16.41 \pm 0.18$           | 101.9       | 1.10          |
|          |                         | 20.0                  | $27.01 \pm 0.17$           | 103.4       | 0.63          |
|          |                         | 30.0                  | $35.11 \pm 0.70$           | 97.2        | 1.99          |
